# Supplementary material
Source: HighWire-hosted journal article supplement (doi:10.1101/rna.048355.114)
Supplement: SuppFile3_DGE_wt_vs_dccr4.xlsx [file SuppFile3_DGE_wt_vs_dccr4.xlsx]

## Sheet: NOTES
The differential expression of adenylated peaks (By vs delta ccr4). NOTE: stingent <0.001 False discovery cut off.
In yellow are the manually curated peaks. Please note that the rRNA and LTR associated peaks may be multi-mapping
In Green are genes involved mating/conjugation
Overall theme is that there is an overall derepression of genes that should be silenced

## Sheet: DGE peaks BY4741 vs Dccr4
Feature	average expression (log2 reads-per-million)	log2 fold-change	+/- at 95% confidence	p	FDR	Length	gene	product	n-with-tail	mean-tail	proportion-with-tail
peak10179	5.76388	3.58391	0.666948	3.62893e-07	0.000503877	101	DDR2	Multistress response protein, expression is activated by a variety of xenobiotic agents and environmental or physiological stresses	44160	27.9338	0.873867
peak11160	3.11825	5.35908	0.942947	2.03362e-07	0.000468079	101	TY3	TY3 LTR extension	940	24.884	0.858447
peak11736	4.04736	3.14584	0.739034	3.7792e-06	0.00141403	101	GLC3	Glycogen branching enzyme, involved in glycogen accumulation; green fluorescent protein (GFP)-fusion protein localizes to the cytoplasm in a punctate pattern	7812	22.4041	0.854798
peak11879	3.57258	2.39389	0.720956	3.94964e-05	0.00656215	101	PET117	Protein required for assembly of cytochrome c oxidase	1175	27.1983	0.894216
peak11896	4.18835	2.73189	0.833362	4.4345e-05	0.00708286	101	RGI1	Protein of unknown function involved in energy metabolism under respiratory conditions; protein abundance is increased upon intracellular iron depletion	15326	28.8339	0.915969
peak12033	3.58761	3.93851	1.03306	1.09487e-05	0.00269406	101		Antisense TY1 LTR	1165	22.2223	0.960429
peak12210	1.92913	3.82209	1.11609	2.98127e-05	0.00547537	101		Antisense TY1 LTR	472	26.9555	0.904215
peak12759	4.20345	2.76303	0.811146	3.13043e-05	0.00552829	101	GCY1	Putative NADP(+) coupled glycerol dehydrogenase, proposed to be involved in an alternative pathway for glycerol catabolism; also has mRNA binding activity; member of the aldo-keto reductase (AKR) family	6111	30.476	0.956937
peak13048	5.29404	5.01771	0.727183	2.64246e-08	0.000202645	101		TY3 LTR extension (runs into SNF2 3'UTR and represses it)	3948	24.2885	0.867311
peak13049	5.66734	4.92134	1.30495	1.21369e-05	0.00294911	101		TY3 LTR extension	7041	27.6817	0.902924
peak13050	5.77028	5.40186	0.940292	1.81833e-07	0.000468079	101		TY3 LTR extension	5924	26.1356	0.873617
peak13216	5.33543	2.45046	0.661207	1.43105e-05	0.00343435	101	ALD4	Mitochondrial aldehyde dehydrogenase, required for growth on ethanol and conversion of acetaldehyde to acetate; phosphorylated; activity is K+ dependent; utilizes NADP+ or NAD+ equally as coenzymes; expression is glucose repressed	30581	21.5409	0.875193
peak13380	4.71245	2.34101	0.658627	2.11506e-05	0.00432785	101	PRM5	Pheromone-regulated protein, predicted to have 1 transmembrane segment; induced during cell integrity signaling	2384	28.4631	0.878408
peak13530	2.16322	4.6395	1.04129	2.41021e-06	0.00113322	101	PRM2	Pheromone-regulated protein, predicted to have 4 transmembrane segments and a coiled coil domain; regulated by Ste12p; required for efficient nuclear fusion	456	31.943	0.912
peak13742	1.97769	5.18709	1.18782	2.93969e-06	0.00120321	101		Antisense to ATS1 (biderectional CCR4 promotor firing?)	368	25.7908	0.842105
peak13807	5.01141	3.20208	0.700096	1.85789e-06	0.000976667	101		TY1 LTR	2686	23.8168	0.743427
peak13884	4.16929	2.80607	0.796295	2.29078e-05	0.00454392	101	MSC1	Protein of unknown function; mutant is defective in directing meiotic recombination events to homologous chromatids; the authentic, non-tagged protein is detected in highly purified mitochondria and is phosphorylated	10701	26.1017	0.870637
peak14283	2.29696	4.88991	1.27818	1.05946e-05	0.00269406	101	SNO1		794	32.9043	0.89819
peak15204	4.4551	3.28903	0.772745	3.78259e-06	0.00141403	101		Antisense rRNA NTS2-1	3081	26.6732	0.85134
peak15205	6.36036	3.33494	0.87428	1.08936e-05	0.00269406	101		Antisense rRNA NTS2-1	2039	22.8396	0.195663
peak15208	5.85117	2.87127	0.788805	1.69406e-05	0.00378515	101		Antisense rRNA NTS2-1	592	14.7939	0.0596895
peak15276	4.53252	3.0749	0.742903	4.96837e-06	0.00163695	101		Antisense rRNA NTS2-2	3060	27.0565	0.857383
peak15277	6.32949	3.3016	0.855495	9.7483e-06	0.00259585	101		Antisense rRNA NTS2-2	2128	22.1955	0.206322
peak15570	7.79885	2.08793	0.63094	4.07237e-05	0.00665769	101	ACO1	Aconitase, required for the tricarboxylic acid (TCA) cycle and also independently required for mitochondrial genome maintenance; phosphorylated; component of the mitochondrial nucleoid; mutation leads to glutamate auxotrophy	21196	26.3133	0.908257
peak15614	4.95309	3.83346	0.701395	3.04739e-07	0.00047001	101	TMA10	Protein of unknown function that associates with ribosomes; putative homolog of the F1F0-ATPase synthase regulator Stf2p	23556	24.7407	0.668882
peak15946	3.4479	3.10991	0.81003	1.02436e-05	0.00267105	101	PRM1	Pheromone-regulated multispanning membrane protein involved in membrane fusion during mating; predicted to have 5 transmembrane segments and a coiled coil domain; localizes to the shmoo tip; regulated by Ste12p	797	33.8457	0.943195
peak161	3.14641	5.29699	1.35742	8.77015e-06	0.00243547	101	PRM3	Pheromone-regulated protein required for nuclear envelope fusion during karyogamy; localizes to the outer face of the nuclear membrane; interacts with Kar5p at the spindle pole body	1046	30.6147	0.938959
peak162	1.84223	4.46028	1.42821	6.83661e-05	0.00952108	101	PRM3	Pheromone-regulated protein required for nuclear envelope fusion during karyogamy; localizes to the outer face of the nuclear membrane; interacts with Kar5p at the spindle pole body	215	26.2698	0.617816
peak16344	2.96587	3.74255	1.0422	1.92272e-05	0.00406258	101		TY3 LTR	162	25.0185	0.205063
peak16508	6.58016	3.44605	0.646882	3.96744e-07	0.000514154	101	AGA1	Anchorage subunit of a-agglutinin of a-cells, highly O-glycosylated protein with N-terminal secretion signal and C-terminal signal for addition of GPI anchor to cell wall, linked to adhesion subunit Aga2p via two disulfide bonds	6909	27.1164	0.894485
peak16637	5.69942	2.14722	0.673744	5.70989e-05	0.00834545	101	GDH2	NAD(+)-dependent glutamate dehydrogenase, degrades glutamate to ammonia and alpha-ketoglutarate; expression sensitive to nitrogen catabolite repression and intracellular ammonia levels	12303	26.797	0.896263
peak17152	4.79028	2.81791	0.725387	9.15645e-06	0.00250693	101	UBC5	Ubiquitin-conjugating enzyme that mediates selective degradation of short-lived, abnormal, or excess proteins, including histone H3; central component of the cellular stress response; expression is heat inducible	4610	25.1119	0.796338
peak17165	3.92553	3.42325	0.740705	1.67469e-06	0.000976667	101	FMP16	Putative protein of unknown function; proposed to be involved in responding to conditions of stress; the authentic, non-tagged protein is detected in highly purified mitochondria in high-throughput studies	8669	22.5589	0.87548
peak17166	3.42324	3.87425	0.963586	6.58097e-06	0.00199887	101	FMP16	Putative protein of unknown function; proposed to be involved in responding to conditions of stress; the authentic, non-tagged protein is detected in highly purified mitochondria in high-throughput studies	41	6.60976	0.00916816
peak17519	3.21204	4.95577	1.06944	1.63054e-06	0.000976667	101		TY3 LTR	1119	28.1055	0.977293
peak17520	5.10143	5.54348	0.838127	4.14246e-08	0.000202645	101		TY3 LTR extension	3273	23.2918	0.784328
peak17522	4.97104	2.82755	0.680399	4.77763e-06	0.0016301	101		TY3 LTR extension	2750	24.2927	0.823847
peak17572	1.87447	2.95882	0.942286	6.51481e-05	0.00917691	101		Antisense TY1 LTR	403	26.8834	0.97343
peak17778	5.43596	3.34828	0.722125	1.621e-06	0.000976667	101	HXT7	High-affinity glucose transporter of the major facilitator superfamily, nearly identical to Hxt6p, expressed at high basal levels relative to other HXTs, expression repressed by high glucose levels	5672	27.656	0.667137
peak17786	1.79711	3.55622	1.06795	3.84866e-05	0.0064495	101		HXT6 extension	6262	18.0953	0.830614
peak17787	4.21094	3.32378	0.802621	4.94379e-06	0.00163695	101	HXT6	High-affinity glucose transporter of the major facilitator superfamily, nearly identical to Hxt7p, expressed at high basal levels relative to other HXTs, repression of expression by high glucose requires SNF3	35318	25.9089	0.85157
peak1792	3.18688	4.10154	0.9861	4.73714e-06	0.0016301	101	GPG1	Proposed gamma subunit of the heterotrimeric G protein that interacts with the receptor Gpr1p; involved in regulation of pseudohyphal growth; requires Gpb1p or Gpb2p to interact with Gpa2p; overproduction causes prion curing	6170	25.8838	0.913803
peak1825	7.53042	5.16133	0.685631	1.04201e-08	0.000202556	101		TY1 LTR	20146	27.4837	0.978056
peak18280	3.2752	3.89059	1.14892	3.30363e-05	0.00562688	101		Antisense TY2 LTR ( full transposon YFL002W-A)	875	21.1417	0.922023
peak18283	1.85562	3.48897	1.01898	2.9857e-05	0.00547537	101		Antisense TY2 LTR (full transposon YFL002W-A)	220	14.7045	0.740741
peak18377	6.98591	3.5272	0.855779	5.17624e-06	0.00165657	101	HXK1	Dubious open reading frame unlikely to encode a functional protein, based on available experimental and comparative sequence data/Hexokinase isoenzyme 1, a cytosolic protein that catalyzes phosphorylation of glucose during glucose metabolism; expression is highest during growth on non-glucose carbon sources; glucose-induced repression involves the hexokinase Hxk2p	24651	30.0689	0.706596
peak18378	3.47688	3.76328	0.822843	1.85898e-06	0.000976667	101	HXK1	Dubious open reading frame unlikely to encode a functional protein, based on available experimental and comparative sequence data/Hexokinase isoenzyme 1, a cytosolic protein that catalyzes phosphorylation of glucose during glucose metabolism; expression is highest during growth on non-glucose carbon sources; glucose-induced repression involves the hexokinase Hxk2p	1509	26.1226	0.728986
peak18439	9.39192	2.49456	0.730052	3.04236e-05	0.00552715	101	GLK1	Putative protein of unknown function; epitope-tagged protein localizes to the cytoplasm/Glucokinase, catalyzes the phosphorylation of glucose at C6 in the first irreversible step of glucose metabolism; one of three glucose phosphorylating enzymes; expression regulated by non-fermentable carbon sources	134474	25.6423	0.769192
peak18656	7.69901	4.5923	1.16685	8.08333e-06	0.00231076	101	FIG2	Cell wall adhesin, expressed specifically during mating; may be involved in maintenance of cell wall integrity during mating	20664	36.9479	0.975085
peak18725	3.76453	3.78131	0.887605	3.74944e-06	0.00141403	101		Antisense TY2 LTR ( full transposon YBL100W_B )	1303	24.3269	0.981175
peak18729	3.65508	3.75176	0.970407	9.58394e-06	0.00258753	101		Antisense TY2 LTR ( full transposon YBL100W_B)	1204	24.402	0.995864
peak1912	0.784513	4.65822	1.40777	4.07565e-05	0.00665769	101		Antisense TY1 LTR	145	25.9724	0.90625
peak1944	7.6705	3.51427	0.630627	2.49333e-07	0.000469323	101	AGA2	Adhesion subunit of a-agglutinin of a-cells, C-terminal sequence acts as a ligand for alpha-agglutinin (Sag1p) during agglutination, modified with O-linked oligomannosyl chains, linked to anchorage subunit Aga1p via two disulfide bonds	12734	31.1426	0.689517
peak19571	2.6617	4.14465	1.18069	2.37382e-05	0.00466107	101	HSP12	Plasma membrane localized protein that protects membranes from desiccation; induced by heat shock, oxidative stress, osmostress, stationary phase entry, glucose depletion, oleate and alcohol; regulated by the HOG and Ras-Pka pathways	1650	17.9182	0.258095
peak19572	7.34213	3.65472	1.17375	7.01877e-05	0.00967644	101	HSP12	Plasma membrane localized protein that protects membranes from desiccation; induced by heat shock, oxidative stress, osmostress, stationary phase entry, glucose depletion, oleate and alcohol; regulated by the HOG and Ras-Pka pathways	232213	14.7475	0.865888
peak2013	6.35207	2.30633	0.633318	1.68691e-05	0.00378515	101	STF2	Protein involved in regulation of the mitochondrial F1F0-ATP synthase; Stf1p and Stf2p may act as stabilizing factors that enhance inhibitory action of the Inh1p protein	16049	27.1832	0.893348
peak20151	5.76301	3.71053	0.816239	1.9746e-06	0.000987465	101	SNZ1	Protein involved in vitamin B6 biosynthesis; member of a stationary phase-induced gene family; coregulated with SNO1; interacts with Sno1p and with Yhr198p, perhaps as a multiprotein complex containing other Snz and Sno proteins	6081	30.8864	0.791076
peak20355	4.75235	2.14366	0.649181	4.15257e-05	0.00672682	101	SPG5	Protein required for survival at high temperature during stationary phase; not required for growth on nonfermentable carbon sources	2911	36.0766	0.911682
peak21383	3.90442	4.19566	0.798889	4.59126e-07	0.000524997	101		TY3 LTR extension	1175	32.6051	0.82514
peak21495	3.72791	5.0114	0.946785	4.23782e-07	0.000514869	101		TY3 LTR extension (runs into KRE6)	1488	30.2406	0.912324
peak21501	5.93065	3.56146	0.743062	1.16244e-06	0.000941526	101	GPH1	Non-essential glycogen phosphorylase required for the mobilization of glycogen, activity is regulated by cyclic AMP-mediated phosphorylation, expression is regulated by stress-response elements and by the HOG MAP kinase pathway/Dubious open reading frame unlikely to encode a functional protein, based on available experimental and comparative sequence data; identified by expression profiling and m…	22492	19.9081	0.80956
peak21897	2.11086	5.6813	1.59295	2.04904e-05	0.00423737	101		TY3 LTR extension	579	29.6339	0.881279
peak21899	5.02759	5.87329	1.47595	7.27009e-06	0.00214126	101		TY3 LTR extension	4786	35.613	0.982147
peak21900	1.33406	5.37409	1.58507	3.26711e-05	0.00562688	101		TY3 LTR extension (overlapping 3'end of AVL9 causing down regulationion)	288	30.0903	0.888889
peak21955	2.90984	3.49736	0.916208	1.08203e-05	0.00269406	101	PUT1	Proline oxidase, nuclear-encoded mitochondrial protein involved in utilization of proline as sole nitrogen source; PUT1 transcription is induced by Put3p in the presence of proline and the absence of a preferred nitrogen source	1035	27.5797	0.797381
peak21980	2.74613	3.90244	1.06639	1.61154e-05	0.0036855	101		antisense rRNA ETS2-1	90	14.2	0.13373
peak21981	2.9074	3.85403	0.908963	3.92717e-06	0.00144038	101		antisense rRNA ETS2-1	623	24.1589	0.910819
peak21982	4.317	3.07949	0.74106	4.77986e-06	0.0016301	101		antisense rRNA ETS2-1	1826	28.9485	0.958027
peak21995	2.31109	4.01372	1.26745	6.04272e-05	0.00870107	101		antisense rRNA ETS2-1	803	23.8107	0.793478
peak22004	4.57352	2.72896	0.849549	5.3216e-05	0.00801912	101		antisense rRNA ETS1-2	1963	24.3658	0.540176
peak22005	5.83626	2.7853	0.796581	2.46182e-05	0.00475809	101		antisense rRNA ETS1-2	1563	21.0326	0.278958
peak22006	6.00683	2.82142	0.799007	2.24763e-05	0.00450431	101		antisense rRNA ETS1-2	4197	17.7615	0.732461
peak22007	3.96858	3.40771	0.850701	6.82062e-06	0.00203979	101		antisense rRNA ETS1-2	173	17.052	0.12777
peak22008	2.70916	4.01818	0.978176	5.34754e-06	0.00166527	101		antisense rRNA ETS1-2	593	24.4384	0.912308
peak22009	3.86882	3.74373	0.764681	9.38266e-07	0.000829043	101		antisense rRNA ETS1-2	1550	30.2994	0.95679
peak22024	2.01352	3.76032	1.21294	7.29329e-05	0.0099841	101		antisense rRNA ETS2-2	664	20.3313	0.823821
peak22239	3.74735	2.61323	0.799027	4.52876e-05	0.00709956	101	BOP2	Protein of unknown function	1272	28.6195	0.8583
peak22785	2.43095	4.23183	1.22653	2.7836e-05	0.00520293	101		TY3 LTR	193	12.6373	0.256308
peak22890	7.46976	2.3763	0.619339	1.03055e-05	0.00267105	101	BAR1	Aspartyl protease secreted into the periplasmic space of mating type a cells, helps cells find mating partners, cleaves and inactivates alpha factor allowing cells to recover from alpha-factor-induced cell cycle arrest	11523	26.8921	0.938814
peak22893	5.68119	4.24347	0.844013	7.16558e-07	0.000696459	101		TY1 LTR downstream of BAR1	3878	30.0057	0.804064
peak23059	3.53884	3.93653	1.06755	1.50041e-05	0.00353225	101		Antisense TY1 LTR	972	20.9537	0.928367
peak23127	2.78827	-2.27367	0.72216	6.36274e-05	0.00902813	101		TY1 LTR extension (3'UTR overlap with GLC3 which is up regulated)	454	18.3943	0.922764
peak23234	4.18888	4.23688	0.750076	2.16714e-07	0.000468079	101		TY3 LTR extension	1733	25.3128	0.899325
peak23235	2.40494	4.72368	1.09644	3.35858e-06	0.0013324	101		TY3 LTR extension	517	25.1992	0.79052
peak23236	2.32643	5.57368	1.10276	6.79182e-07	0.000694875	101		TY3 LTR extension	552	25.2373	0.893204
peak23237	1.34071	5.13729	1.48523	2.72007e-05	0.00513353	101		TY3 LTR extension	250	22.168	0.759878
peak23448	4.91227	3.07219	0.676043	1.98113e-06	0.000987465	101		TY3 LTR extension	2877	23.9545	0.836094
peak23535	4.88662	2.93892	0.673725	2.97104e-06	0.00120321	101		TY1 LTR (Full transposon YER160c)	2713	24.3612	0.829156
peak240	5.04055	2.20325	0.69113	5.69549e-05	0.00834545	101	PRM4	Pheromone-regulated protein proposed to be involved in mating; predicted to have 1 transmembrane segment; transcriptionally regulated by Ste12p during mating and by Cat8p during the diauxic shift	4360	27.3894	0.756157
peak2746	2.47551	4.04631	0.918813	2.7051e-06	0.00115328	101	MOH1,RRT1	Protein of unknown function, has homology to kinase Snf7p; not required for growth on nonfermentable carbon sources; essential for survival in stationary phase,Identified in a screen for mutants with increased levels of rDNA transcription; dubious open reading frame unlikely to encode a protein, based on experimental and comparative sequence data	1083	20.6464	0.572713
peak2812	4.55644	3.00403	0.675296	2.44844e-06	0.00113322	101		TY3 LTR	1938	23.8039	0.789731
peak2814	3.66718	6.45662	1.16572	2.65577e-07	0.000469323	101		TY3 LTR extension	1917	31.1758	0.939706
peak2961	3.76481	5.51795	0.879657	7.24755e-08	0.00028177	101	FIG1	Integral membrane protein required for efficient mating; may participate in or regulate the low affinity Ca2+ influx system, which affects intracellular signaling and cell-cell fusion during mating	1611	32.8709	0.909142
peak3021	5.25645	3.44809	0.972905	2.1726e-05	0.00439928	101	HSP26	Small heat shock protein (sHSP) with chaperone activity; forms hollow, sphere-shaped oligomers that suppress unfolded proteins aggregation; oligomer activation requires heat-induced conformational change; also has mRNA binding activity	40500	23.1033	0.684966
peak3628	2.45821	3.13424	0.969835	5.04118e-05	0.00771617	101	ARG3	Ornithine carbamoyltransferase (carbamoylphosphate:L-ornithine carbamoyltransferase), catalyzes the sixth step in the biosynthesis of the arginine precursor ornithine	596	28.5302	0.860029
peak3682	8.05284	3.17005	0.666859	1.26268e-06	0.000976667	101	TDH1	Glyceraldehyde-3-phosphate dehydrogenase, isozyme 1, involved in glycolysis and gluconeogenesis; tetramer that catalyzes the reaction of glyceraldehyde-3-phosphate to 1,3 bis-phosphoglycerate; detected in the cytoplasm and cell wall	181167	21.4663	0.935408
peak3713	3.38131	2.4524	0.756815	4.92115e-05	0.00759224	101	IRC18	Putative protein of unknown function; expression induced in respiratory-deficient cells and in carbon-limited chemostat cultures; similar to adjacent ORF, YJL038C; null mutant displays increased levels of spontaneous Rad52p foci	1751	22.5385	0.905377
peak4078	1.66943	3.25729	1.01158	5.20768e-05	0.00790876	101	HXT16	(subtelomeric)	812	28.6158	0.943089
peak4157	4.00838	3.09387	0.954454	4.90642e-05	0.00759224	101		Antisense TY1 LTR ( full transposon YCL020W)	1298	24.5593	0.993874
peak4161	4.07023	3.73493	0.910085	5.39699e-06	0.00166527	101		Antisense TY1 LTR ( full transposon YCL020W)	1478	22.9499	0.951094
peak4165	4.23051	3.30507	0.916036	1.83985e-05	0.00394249	101		Antisense TY1 LTR ( full transposon YCL020W)	1526	22.31	0.954346
peak4459	5.57469	2.26749	0.692859	4.50213e-05	0.00709956	101	AIM17	Putative protein of unknown function; the authentic, non-tagged protein is detected in highly purified mitochondria in high-throughput studies; null mutant displays reduced frequency of mitochondrial genome loss	4058	33.0596	0.911296
peak5495	3.28483	2.60102	0.811945	5.45364e-05	0.00815486	101	CRG1	mRNA binding protein and putative S-adenosylmethionine-dependent methyltransferase; mediates cantharidin resistance	926	30.8715	0.886124
peak5549	2.88904	2.41072	0.77219	6.8571e-05	0.00952108	101		antisense/bidirection to HXT15 promotor (subtelomeric)	1060	24.3094	0.89527
peak5598	0.424462	-3.46825	1.01911	3.15675e-05	0.00552829	101		antisense to FMP45 3'UTR	132	29.6742	0.963504
peak5623	1.1332	3.91847	1.243	6.29141e-05	0.00899255	101	RTN2	Protein of unknown function; has similarity to mammalian reticulon proteins; member of the RTNLA (reticulon-like A) subfamily	752	21.1396	0.652778
peak6021	4.53224	3.11741	0.794541	8.32516e-06	0.0023454	101		TY2 LTR	1848	24.9913	0.963504
peak6033	4.25406	4.70667	0.974079	1.07136e-06	0.000905487	101		Predicted tail-anchored plasma membrane protein containing a conserved CYSTM module; related proteins in other organisms may be involved in response to stress; green fluorescent protein (GFP)-fusion protein localizes to the cell periphery	3023	26.4727	0.931587
peak6123	10.3074	2.73061	0.649289	4.25366e-06	0.00153124	101	SED1	Distal APA	113892	29.6843	0.854551
peak6175	2.379	4.52639	0.973196	1.57165e-06	0.000976667	101		antisense TY1 LTR extension (promotor ? Of full transposon YDR098 )	423	35.1466	0.851107
peak6176	3.74624	3.32254	0.755137	2.72909e-06	0.00115328	101		antisense TY1 LTR extension (promotor ? Of full transposon YDR098 )	946	34.5899	0.973251
peak6193	4.80611	2.71767	0.68923	7.93827e-06	0.00230317	101		TY3 LTR	2702	24.0933	0.909764
peak6195	2.80857	4.81752	1.33568	1.8456e-05	0.00394249	101		TY3 LTR extension	769	25.2094	0.928744
peak6196	2.09925	5.29271	1.55225	3.10227e-05	0.00552829	101		TY3 LTR extension	392	25.9311	0.619273
peak6197	4.20929	4.44168	0.896144	8.28343e-07	0.000766769	101		TY3 LTR extension (overlapping 3'end of TMN2 causing down regulation)	1240	23.125	0.639175
peak6198	5.42766	5.04097	0.762627	4.16987e-08	0.000202645	101		TY3 LTR extension (overlapping 3'end of TMN2 causing down regulation)	4635	25.702	0.984285
peak6199	3.88687	4.28921	0.828837	5.33937e-07	0.000576622	101		TY3 LTR extension (overlapping 3'end of TMN2 causing down regulation)	1017	20.2586	0.732709
peak6326	5.47678	2.28535	0.658098	2.62256e-05	0.00499804	101	HSP42	Small heat shock protein (sHSP) with chaperone activity; forms barrel-shaped oligomers that suppress unfolded protein aggregation; involved in cytoskeleton reorganization after heat shock	13371	22.945	0.901375
peak6342	4.83009	2.19625	0.648925	3.32032e-05	0.00562688	101	SDH4	Membrane anchor subunit of succinate dehydrogenase (Sdh1p, Sdh2p, Sdh3p, Sdh4p), which couples the oxidation of succinate to the transfer of electrons to ubiquinone as part of the TCA cycle and the mitochondrial respiratory chain	7758	22.4639	0.693112
peak6963	10.5491	2.2007	0.60709	1.76087e-05	0.00384602	101	MFA1	Mating pheromone a-factor, made by a cells; interacts with alpha cells to induce cell cycle arrest and other responses leading to mating; biogenesis involves C-terminal modification, N-terminal proteolysis, and export; also encoded by MFA2	101792	33.1316	0.90769
peak7210	6.07313	3.45832	0.734077	1.3821e-06	0.000976667	101	ASG7	Protein that regulates signaling from a G protein beta subunit Ste4p and its relocalization within the cell; specific to a-cells and induced by alpha-factor	4831	27.775	0.829926
peak7541	2.30095	3.06833	0.906854	3.32883e-05	0.00562688	101	SAG1	Alpha-agglutinin of alpha-cells, binds to Aga1p during agglutination, N-terminal half is homologous to the immunoglobulin superfamily and contains binding site for a-agglutinin, C-terminal half is highly glycosylated and contains GPI anchor	420	38.6881	0.9375
peak7542	2.4794	2.84197	0.833895	3.11586e-05	0.00552829	101	SAG1	Alpha-agglutinin of alpha-cells, binds to Aga1p during agglutination, N-terminal half is homologous to the immunoglobulin superfamily and contains binding site for a-agglutinin, C-terminal half is highly glycosylated and contains GPI anchor	500	29.174	0.912409
peak8609	1.68516	3.50981	1.09836	5.57579e-05	0.00827387	101	COS12	Protein of unknown function, member of the DUP380 subfamily of conserved, often subtelomerically-encoded proteins	188	33.4255	0.866359
peak8610	2.19749	3.69541	1.00274	1.50853e-05	0.00353225	101	COS12	Protein of unknown function, member of the DUP380 subfamily of conserved, often subtelomerically-encoded proteins	337	35.7537	0.965616
peak8761	-0.242534	5.98842	1.88377	5.83981e-05	0.00847165	101	IME4	Probable mRNA N6-adenosine methyltransferase required for entry into meiosis; transcribed in diploid cells; haploids repress IME4 transcription via production of antisense IME4 transcripts; antisense transcription is repressed in diploids	92	24.337	0.793103
peak8825	4.11007	3.51776	0.799015	2.71256e-06	0.00115328	101	AMS1	Vacuolar alpha mannosidase, involved in free oligosaccharide (fOS) degradation; delivered to the vacuole in a novel pathway separate from the secretory pathway	3949	18.997	0.63745
peak9019	3.96947	3.09174	0.750456	5.19835e-06	0.00165657	101		TY3 LTR	1353	18.7731	0.725469
peak9191	5.9478	3.80632	0.648122	1.44556e-07	0.000468079	101	GSC2	Catalytic subunit of 1,3-beta-glucan synthase, involved in formation of the inner layer of the spore wall; activity positively regulated by Rho1p and negatively by Smk1p; has similarity to an alternate catalytic subunit, Fks1p (Gsc1p)	13351	26.1109	0.821044
peak9207	1.51658	3.75833	1.05158	2.00976e-05	0.00420083	101		Antisense TY2 LTR ( full transposon YGRCTY2-1 )	164	11.25	0.643137
peak9209	1.36988	4.18184	1.15351	1.75948e-05	0.00384602	101		Antisense TY2 LTR ( full transposon YGRCTY2-1 )	200	11.23	0.743494
peak9348	4.68502	3.13176	0.68036	1.74318e-06	0.000976667	101		Antisense TY3 LTR	1733	21.3058	0.640429
peak9352	4.84918	3.12632	0.700535	2.3718e-06	0.00113322	101		TY3 LTR	2606	23.7694	0.798407
peak9353	3.50555	5.07535	1.14969	2.64102e-06	0.00115328	101		TY3 LTR extension	1045	25.9512	0.852365
peak9354	2.50123	5.62004	1.20415	1.51804e-06	0.000976667	101		TY3 LTR extension	576	28.4288	0.791209
peak9385	4.7816	3.22136	0.700113	1.75034e-06	0.000976667	101		TY3 LTR	2677	23.7157	0.830335
peak9387	4.33459	4.7462	0.871008	3.14323e-07	0.00047001	101		TY3 LTR extension	1911	24.1643	0.860036
peak9388	0.449031	7.14742	1.94186	1.52636e-05	0.00353225	101		TY3 LTR extension	242	30.2314	0.889706
peak9665	2.53054	3.19725	0.914812	2.47218e-05	0.00475809	101	SOL4	6-phosphogluconolactonase with similarity to Sol3p	2232	25.4969	0.928839
peak9686	9.48029	2.76355	0.601481	1.77573e-06	0.000976667	101	ENO1	Enolase I, a phosphopyruvate hydratase that catalyzes the conversion of 2-phosphoglycerate to phosphoenolpyruvate during glycolysis and the reverse reaction during gluconeogenesis; expression is repressed in response to glucose	107843	23.2396	0.950535
peak9834	4.37479	-3.24711	0.701901	1.6583e-06	0.000976667	101	CCR4	Component of the CCR4-NOT transcriptional complex, which is involved in regulation of gene expression; component of the major cytoplasmic deadenylase, which is involved in mRNA poly(A) tail shortening	5616	24.0563	0.889452
peak9835	-1.38961	-5.22803	1.59524	4.44523e-05	0.00708286	101	CCR4	Component of the CCR4-NOT transcriptional complex, which is involved in regulation of gene expression; component of the major cytoplasmic deadenylase, which is involved in mRNA poly(A) tail shortening	284	21.4754	0.837758
