# Supplementary material
Source: HighWire-hosted journal article supplement (doi:10.1101/rna.048355.114)
Supplement: SuppMethods.docx [file SuppMethods.docx]

**PAT- Seq: Beilharz Lab workflow**


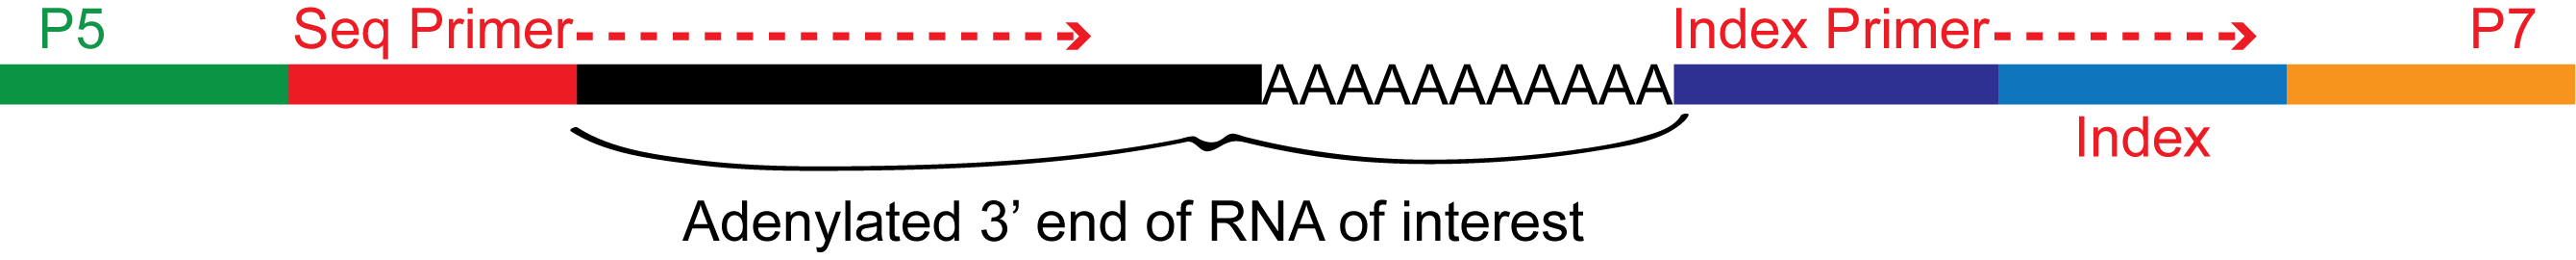


**
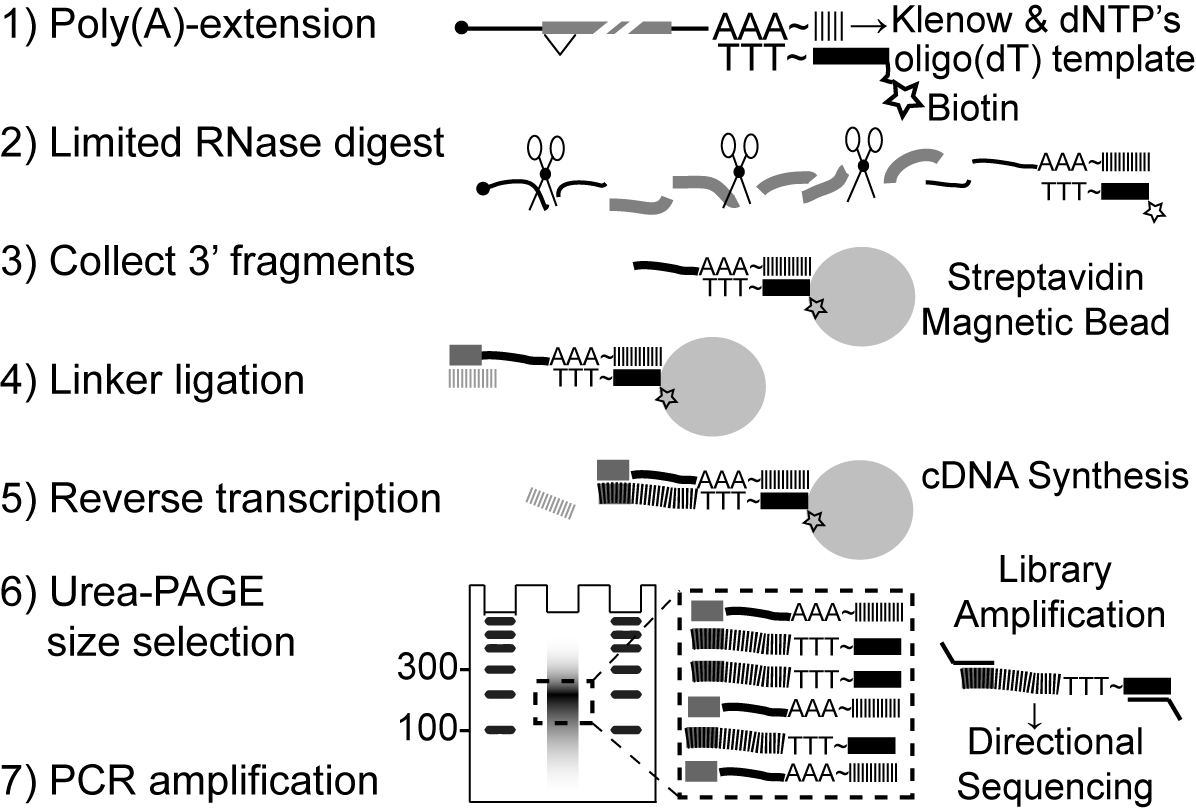
The PAT-seq workflow.**

**1**) Poly(A)-tails are extended with dNTPs on a DNA template. **2**) RNA is subjected to limited digestion. **3**) The 3’ fragments are concentrated on magnetic beads. **4**) Splinted linkers are ligated to the 5’ ends. **5**) cDNA synthesis is primed from the bead-tethered oligo dT tracts. **6**) The cDNA library is amplified with barcodes for multiplexing. **7**) Sequencing is by Illumina chemistry and 150 bp reads. **Note:** Sequencing is strand specific and proceeds from 3’UTR sequence into poly(A)-homopolymers .

DAY1 (~4 hours )

STEP 1: End-extend adenylated RNA with an ePAT reaction.

This step generates a 3’ tag on adenylated RNA ensuring that reverse transcription is only possible from true 3’ ends and not internal sites. The template oligo is 5’ biotinylated for streptavidin magnetic bead enrichment.

STEP 2: Limited fragmentation of RNA with RNaseT1.

RNase T1 cuts after G residues and thus a limited digestion leaves all poly(A)-tracts and the 3’ DNA-tag intact.

STEP 3: Collect 3’ Fragments with streptavidin magnetic beads and 5’ Phosphorylate fragments with PNK.

Concentrates the extended 3’ fragments on beads for subsequent steps. RNase T1 generates a 5’ Hydroxyl and a 3’ Phosphate, but a 5’ phosphate is required for the ligation of the 5’ –splinted linker.

STEP 4: Ligate 5’ splinted-linker.

This adds the sequence necessary at the 3’ end of the cDNA in the RT step for directional sequencing.

DAY 2 (~ 5 hours)

STEP 5: Reverse Transcribe.

Excess 5’ splint is removed and the bead-bound biotinylated oligo is used to prime reverse transcription.

STEP 6: Size select cDNA.

The cDNA is run on 6% UREA-PAGE and selected for an insert appropriate to the organism and the read-length of the platform.

STEP 7: PCR amplify the library

A proportion of the library is amplified to introduce Illumina P5, index and P7 sequences

**STEP 1: END EXTENTION**

1. Assemble as for the ePAT reaction in PCR strip-tubes using the illumine Bio-EE oligo [(Bio)CAGACGTGTGCTCTTCCGATCTTTTTTTTTTTTTTTTTT] @ 100 μM

In 20 µl reaction:

11 μl RNA/dH2O (1 µg total RNA) 80 °C for 5 min

1 μl Bio-EE primer (100 µM) 🡫

Flash-spin

🡫

4 μl 5X SSIII buffer 37 °C assembly

1 µl DTT

1 µl dNTPs (10mM each)

1 µl RnaseOut

1 µl Klenow polymerase exo- (low conc) add this at 37 °C

1. Mix, flash-spin, and transfer to a preheated PCR machine with an accessible lid.

37 °C for 30 min hour

80 °C for 5 min

*Pause: Open lid*

Add 80 μl 1x digest buffer (see reagent list)

*Close lid and continue for further 10 min to ensure disruption of secondary structure.*

3. Transfer to ice block for 5 min

**STEP 2: Fragment RNA with RNaseT1**

**Limited RNase T1 digestion.**

RNase T1 cuts RNA after G residues. (pNpNpGpNpN leaving pNpNpGp +NpN) It is used here to fragment RNA to an average of around ~250 bases. Note: the limited time, temp and concentration of RnaseT1 was optimised in the Beilharz lab but may need to be re-optimised depending on local conditions.

1. Transfer end-extend RNA in digest buffer to cooled metal block on ice for 5 min to make sure the sample is really cold.
2. Prepare of a 1/1000 dilution of RNase T1 (Roche, 100,000 U/ml) in digest buffer. It is best to make 1 ml or more depending on sample number. [*be really careful to dispose of tips cleanly and change gloves after handling the RNase stock tube. We don’t want this enzyme spread around*… ]. Add 100 µl of this dilute RNase mix to a pre-spun 1.5 ml phase-loc tube and cool on ice for 5 min to make sure the sample /tube is chilled. At this time also prepare a 50:50 acid phenol/chloroform mix in the fume hood so you can add it immediately once the minute is up.
3. Take your ice bucket to the fume hood and add the end-extended RNA to the phase-loc tube. Start the timer, for 2 min. Vortex briefly, and return to ice. Stop the reaction by adding 200 μl phenol/chloroform and shake vigorously!! If you have several samples, do them sequentially (pairs at most) to make sure timing is consistent, keep in ice until all samples are ready to extract. Spin @ top speed for 5 min at room temp in a bench top centrifuge.
4. Extract once with Chloroform. Shake tube vigorously (long axis of tube). Spin @ top speed for 5 min.
5. Transfer top layer to a new tube containing 100 μl streptavidin beads [prewashed in sequentially, 1 x in room-temp dH2O and 1x in 55 **°**C digest buffer buffer ].
6. Allow DNA:RNA duplex to bind to beads 15 min @ 37 **°**C with shaking (we us an Eppendorf thermomixer® comfort).
7. Concentrate beads on magnetic rack and suspend with 200 μl 1/10th strength 5x Superscript III (SSIII) buffer @ 55 **°**C for 5 min.
8. Concentrate beads and wash once with 100 μl 1x T4 DNA ligase buffer (+ATP) @ 37 **°**C with shaking. Concentrate again and remove supernatant.

**STEP 3: 5’ Phosphorylate fragments with PNK**

Because the RNase T1 leaves phosphate on the 3’ end a 5’ phosphate needs to be added.

1. To the beads above, add 20 µl of a master-mix (1/20 PNK in 1x T4 DNA ligase buffer (+ATP)). Incubate for 30 minutes at 37 °C with gentle shaking.
2. Heat inactivate @ 70 **°**C for 10 minutes. Cool slowly to room temp.

1. Wash in 200 μl 1/10th strength 5xSSIII buffer @ room-temp and concentrate.

**STEP 4: Ligate 5’ splinted linker**

Assuming ~1 microliters of beads from above, add the following, and transfer to PCR tubes.

8 µl reaction on ice

2 µl dH2O

2 µl 5’ Splinted-linker mix (see reagent list)

3 µl 2x Hyb’ buffer (see reagent list)

Incubate @ 65 **°**C for 10 min then 16 **°**C for 5 minutes (program in thermocycler).

Then add as a master mix

10 µl 2x ligase buffer (see reagent list)

2 µl RNA ligase 2 (NEB)

Incubate @ 16 **°**C for 16 hours

(Set as two separate PCR programs with matching lid temps: *Be very careful pipetting viscose solutions, make sure the solutions really are mixed)*

**STEP 5: Reverse Transcribe.**

Rely on the biotinylated bound oligo to prime reverse transcription.

1. Add 100 μl 1/10th strength 5x SSIII buffer directly to the ligation reaction in the PCR-strip tubes above (STEP 4). Apply to magnetic rack and remove supernatant. Add RT master mix directly to the same tube assume ~1µl magnetic beads.
2. For a 20 µl RT reaction: add 18 µl of a master mix below to the ligation

11 µl dH2O 70 °C for 5 min

4 μl 5X SSIII buffer Flash-spin

1 µl DTT 🡫

1 µl dNTPs (10mM each)

1 µl RnaseOut 55 °C

🡫1 min

1 µl Superscript III on block add to tubes in thermocycler block

(*mix by rapid inversion, and flash spin trying to maintain temperature*).

1. Incubate for 60 min @ 55 °C. Inactivate @ 70 °C for 5 min and cool to 12 °C.
2. Add 100 μl 1/10th strength 5x SSIII buffer directly to the RT reaction in the PCR-strip tubes. Apply to magnetic rack and remove supernatant. (Can be stored at -80 °C at this point).

**STEP 6: UREA-PAGE Size select cDNA**

See also <http://www.nature.com/protocolexchange/protocols/1889#/reagents> for a useful information.

1. Pre prepare 6% UREA_PAGE

(10 ml is enough for one Hoeffer mini-gel 10x15cm; 1mm spacers)

10X TBE 1 ml

Urea (ultrapure) 4.2 g

40% Acrylamide 1.5 ml

milliQ-H2O 4.5 ml

Add 10 μl TEMED and 25 μl 25% APS immediately prior to pouring the gel. The gel mix is best made fresh as storing the mix results in sloppy gels. Note, the urea needs warmth to go into solution.

1. Prepare cDNA for gel purification by addition of 2x formamide PAGE loading buffer to the washed beads and transfer to eppies. Incubate at 80 °C for 5 min then flash cool on ice. Treat DNA ladder (Bioline HyperLadder™ 25 bp or similar) in the same way. Remember to dilute the ladder a lot so that it doesn’t overwhelm the imaging (for the HyperLadder™ 25 bp, dilute 2 µl into 100 µl binding buffer and load 10). Just prior to loading pulse-spin the eppies to sediment the magnetic beads.
2. Pre-run the gel for 30 minutes @ 180 Volts to ensure even warmth. Just prior to loading flush the lanes of the gel carefully with a syringe to remove Urea. Then load interspersed with 25bp ladder to ensure accuracy in size selection.
3. Run the gel @ 180 Volts until the bromophenol blue has migrated 2/3rd down the gel (~ 40 min).
4. Remove the gel from the plates. Cut off the bottom half of the gel (just above the bromophenol blue band) to get rid of most of the oligos prior to staining. Incubate gel for 5 min in 30 ml 1x TBE with 1 µl Gelstar nucleic acid stain. Image the gel on a glass plate.
5. Print the image 1:1, then place the gel still on the glass plate on top of the printout to prepare for cutting. Excise the material between 120 and 300 bases for yeast RNA, 120-400 for metazoan libraries, using a new hard-edge scalpel blade.
6. Shred gel slice by placing in 0.5ml tube (which has been punctured with a 21 gauge needle). Place 0.5ml tube in 2 ml LoBind tube and centrifuge for 3 mins @ 13,000g.
7. Add 300 µl dH2O to shredded material. Incubate o/n at 4 °C or for 3 hours at 37 °C with gentle agitation.
8. Transfer (by pouring) eluted material + gel slurry from the 2 ml lobind eppie to corning X-spin column to separate cDNA containing liquid from gel.
9. To precipitate the cDNA, transfer to a 1.5 ml lobind eppie containing 2 μl Glyco-blue (Life Technologies), 1/10th vol 5 M Ammonium Acetate, and mixing thoroughly before adding an equal volume (350 μl) isopropanol. Incubate on ice for 5 min. Then Centrifuge 13000 *g* for 20 min @ 4 °C. Wash in 80% ethanol. Remove all of the supernatant by an additional flash spin and air-dry pellet. Resupend the libraries in 30 μl dH2O.

**STEP 7: PCR amplify the library**

It is imperative that no PCR contamination can occur!!! So be prepared to separate the analysis of amplified libraries from where they are prepared.

Preprogram the thermo cycler:

94 °C for 10 minutes

[94 °C for 20 seconds; 60° C for 20 seconds; 72 °C for 30 seconds] x 16 cycles

72 °C for 1 min

12 °C hold

In 100 µl reaction:

50 μl 2x Amplitaq 360 master

37 μl dH2O

1 μl Universal seq primer (100 µM)

2 μl indexed reverse primer (50 µM)

10 μl library cDNA

Run 10% of the amplified library on a high resolution 2% Agarose gel. In the Beilharz lab we use intensities on this gel to pool libraries to approximate stoichiometry and then hand them over to the sequencing facility where the PCR products are purified (from primers) using a bead based reagent and quantitated for sequencing.

**REAGENT LIST:**

**Biologicals and Reagents:**

**Bio-EE oligo** [(Bio)CAGACGTGTGCTCTTCCGATCTTTTTTTTTTTTTTTTTT]

**PAT-seq splint A** [5’-CCCTACACGACGCTCTTCCG(rA)(rT)(rC)(rT) 3’]

**PAT-seq Splint B** [5’NNNNAGATCGGAAGAGCGTCGTGTAGGG 3’]

**PAT-seq Universal** [5’AATGATACGGCGACCACCGAGATCTACACTCTTTCCCTACACGACGCTCTTCCG]

ScriptSeq™ Index PCR Primers (epicentre)

Super Script III & buffers (Life Technologies)

RNaseOUT (Life Technologies)

Klenow Polymerase (-exo) (NEB)

RNase T1 (Roche, 100,000 U/ml)

Phenol/chloroform (made fresh from Acid Phenol (Ambion) and Cholorform IAA (Sigma))

Streptavidin magnetic beads (NEB)

Poly Nucleotide Kinase (NEB)

T4 DNA ligase buffer (+ATP)(NEB)

50% Peg 8000 (NEB)

24% Peg 8000 (dilute from stock or make new)

T4 RNA ligase 2 & buffer(NEB)

UREA-PAGE reagents and apparatus and imaging capability

HyperLadder™ 25 bp (Bioline)

Gelstar nucleic acid stain (Lonza)

Glyco-blue (Life Technologies)

5 M Ammonium Acetate (Ambion)

2x Amplitaq 360 master (Applied Biosystems)

Agarose 1000 (Life Technologies)

**Buffers:**

10x digest buffer *(for 1ml combine from RNase free stocks)*

300 μl dH2O

600 μl 5 M NaCl

100 μl Tris (pH7.5)

2x Hyb’ buffer: Make enough for multiple tubes and store at -80°C

4 parts 50% Peg 8000 (NEB)

1 part 5x SSIII buffer (Life Technologies)

2x ligation buffer: enough for 4 reactions

40 µl 24% Peg 8000

10 µl 10x RNL2 buffer (NEB)

5’ Splinted-linker:

Pre-anneal stoichiometrically balanced splint primers below at a final primer concentration of 200µM (use a spec to get this accurate). Make this ahead of time and store at -80 °C in small aliquots.

PAT-seq 5’splint A 5’CCCTACACGACGCTCTTCCG(A)(T)(C)(T) (RNA bases)

PAT-seq 5’splint B 3’GGGATGTGCTGCGAGAAGGCTAGANNNN

400 µl stock in 1.5 ml eppie

100 µl PAT-seq 5’splint A (200µM)

100 µl PAT-seq 5’splint B (200µM)

100 µl 2x Hyb’ buffer

100 µl dH2O

Bring to 95 °C in a heat block for 5 minutes. Then remove the metal block from the instrument and cool to room –temp on the bench (~1 hour). Distribute in 20 µl aliquots for longer-term storage.

2x Formamide gel loading buffer:

Make fresh just prior to use by adding 1/100th volume loading dyes to a solution of 9 parts deionised Formamide and 1 part 10 x TBE. The loading dyes are pre-prepared by dissolving 40 mg of each Bromophenol blue and Xylene cyanol FF in 1 ml of Methanol.

**Consumables**

Eppendorf Safe-Lock micro test tubes, 1.5 ml,

1.5 ml phase-loc tubes (5’PRIME)

Eppendorf DNA LoBind Tubes: 2.0 ml & 1.5 ml

Axygen 0.5 ml PCR tubes and strip tubes

Hard-edge scalpel blades

Corning Costar Spin-X centrifuge tube filters
